# Supplementary material for: Constraint-based perturbation analysis with cluster Newton method: a case study of personalized parameter estimations with irinotecan whole-body physiologically based pharmacokinetic model
Source: PubMed Central journal article supplement (PMC5763286; doi:10.1186/s12918-017-0513-2), 2017-12-21
Supplement: 12918_2017_513_MOESM1_ESM.pdf [file 12918_2017_513_MOESM1_ESM.pdf]

**Additional file 1: A simple model for parameter estimations with and without constraint**

[Setting]

We estimate parameters of “ $Y=AX+B$ ” as a simple pharmacological model. Three patients are prepared. Clinically observed data of X and Y in each patient are shown in Table 1. Parameter A is not influenced by individual varieties. On the other hand, parameter B is influenced.

**Table S1 Individual clinical observed data of X and Y**

|        | Patient 1 | Patient 2 | Patient 3 |
|--------|-----------|-----------|-----------|
| X1, Y1 | 2, 100    | 3, 200    | 4, 4      |
| X2, Y2 | 7, 160    | 5, 300    | 8, 80     |
| X3, Y3 | 18, 350   | 15, 500   | 20, 200   |

[Parameter estimation with and without constraint]

When we estimate parameter A and B without constraint, the estimated parameters are in Table 2; they are shown as points on the solid lines in Figure 1. The values of parameters A and B are determined by each other. Then, individual characteristics of parameter B may be masked.

After the parameter estimation without constraint, we calculate the median of the values of parameter A among all patients. Next, we estimate parameter B by using the median value as common parameter A, that is, parameter estimation with a constraint. The estimated parameters are in Table 1 and are illustrated as points on the dotted lines in Figure 1. The estimated parameter B significantly reflects individual varieties, since X and Y are individually observed data, and parameter A is common.

**Table S2 Values of parameter A and B by parameter estimation with and without constraint**

| Parameter                      | Patient 1 | Patient 2 | Patient 3 |
|--------------------------------|-----------|-----------|-----------|
| Without constraint             |           |           |           |
| A                              | 15.9      | 23.4      | 12.4      |
| B                              | 60.3      | 154.0     | -34.3     |
| With constraint of parameter A |           |           |           |
| A (common)                     | 17.2      | 17.2      | 17.2      |
| B'                             | 48.3      | 201.2     | -85.8     |

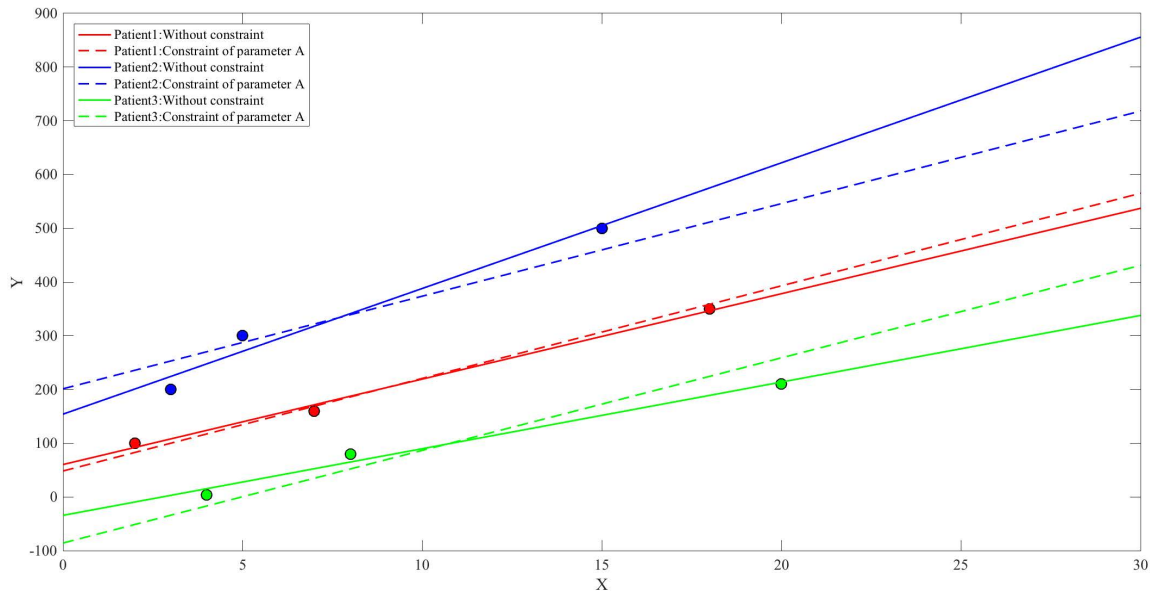

**Figure S1 Parameter estimation with and without constraint**
