# Supplementary material for: Constraint-based perturbation analysis with cluster Newton method: a case study of personalized parameter estimations with irinotecan whole-body physiologically based pharmacokinetic model
Source: PubMed Central journal article supplement (PMC5763286; doi:10.1186/s12918-017-0513-2), 2017-12-21
Supplement: 12918_2017_513_MOESM2_ESM.pdf [file 12918_2017_513_MOESM2_ESM.pdf]

## **Additional file 2: The Ordinary Differential Equations in our WB-PBPK model**

### **Nomenclature**

**General.**  $Q$ , blood flow rate;  $V$ , blood or organ weight;  $C$ , concentration;  $X$ , amount of compound;  $K_p$ , tissue-plasma concentration ratios;  $CL_r$ , renal clearance;  $CL_{bile}$ , biliary clearance to transit compartment;  $CL_{CES,1}$ , metabolic clearance of CPT-11 by CES2 to form SN-38;  $CL_{CES,2}$ , metabolic clearance of NPC by CES2 to form SN-38;  $CL_{3A4,1}$ , metabolic clearance of CPT-11 by CYP3A4 to form APC;  $CL_{3A4,2}$ , metabolic clearance of CPT-11 by CYP3A4 to form NPC;  $CL_{UGT}$ , metabolic clearance of SN-38 by UGT to form SN-38G;  $k_a$ , absorption rate constant;  $k_{bile}$ , kinetic constant for the transit in bile compartments to small intestine;  $k_{L.I.}$ , kinetic constants for the transit from small intestine to large intestine;  $k_{feces}$ , kinetic constant for the transit from large intestine to feces.

**Subscripts.** H.A., hepatic artery; H.V., hepatic vein; S.I., small intestine; L.I., large intestine. “i” corresponds to CPT-11 or one of the metabolites; 1, 2, 3, 4 and 5 represent CPT-11, SN-38, SN-38G, NPC and APC, respectively. “j” corresponds to Heart, Brain, Muscle, Adipose, Skin or Bone. “k” corresponds to Spleen, Pancreas, Stomach, Small

intestine or Large intestine.

## Ordinary Differential Equations

The following ordinary differential equations for all patients are used in our study.

Volume and blood flow rate in Table 1 are used for each patient.

### (1) Compartments in blood circulatory system

- Venous blood

$$\begin{aligned} V_{\text{venous}}(dC_{\text{Venous},i}/dt) = & Q_{\text{Heart}}C_{\text{Heart},i}/Kp_{\text{Heart},i} + Q_{\text{Brain}}C_{\text{Brain},i}/Kp_{\text{Brain},i} + \\ & Q_{\text{Muscle}}C_{\text{Muscle},i}/Kp_{\text{Muscle},i} + Q_{\text{Adipose}}C_{\text{Adipose},i}/Kp_{\text{Adipose},i} + Q_{\text{Skin}}C_{\text{Skin},i}/Kp_{\text{Skin},i} + \\ & Q_{\text{Bone}}C_{\text{Bone},i}/Kp_{\text{Bone},i} + Q_{\text{Kidney}}C_{\text{Kidney},i}/Kp_{\text{Kidney},i} + Q_{\text{H.V.}}C_{\text{Liver},i}/Kp_{\text{Liver},i} - Q_{\text{Lung}}C_{\text{Venous},i} \end{aligned}$$

- Artery blood

$$\begin{aligned} V_{\text{Artery}}(dC_{\text{Artery},i}/dt) = & Q_{\text{Lung}}C_{\text{Lung},i}/Kp_{\text{Lung},i} - (Q_{\text{Heart}} + Q_{\text{Brain}} + Q_{\text{Muscle}} + Q_{\text{Adipose}} + Q_{\text{Skin}} \\ & + Q_{\text{Bone}} + Q_{\text{Kidney}} + Q_{\text{Spleen}} + Q_{\text{Pancreas}} + Q_{\text{Stomach}} + Q_{\text{S.I.}} + Q_{\text{L.I.}} + Q_{\text{H.A.}})C_{\text{Artery},i} \end{aligned}$$

- Lung

$$V_{\text{Lung}}(dC_{\text{Lung},i}/dt) = Q_{\text{Lung}}(C_{\text{Venous},i} - C_{\text{Lung},i}/Kp_{\text{Lung},i})$$

- Heart, Brain, Muscle, Adipose, Skin, Bone

$$V_j(dC_{j,i}/dt) = Q_j(C_{Artery,i} - C_{j,i}/Kp_{j,i})$$

- Kidney

$$V_{Kidney}(dC_{Kidney,i}/dt) = Q_{Kidney}(C_{Artery,i} - C_{Kidney,i}/Kp_{Kidney,i}) - CL_{r,i}C_{Kidney,i}/Kp_{Kidney,i}$$

- Spleen, Pancreas, Stomach, Small intestine, Large intestine

$$V_k(dC_{k,i}/dt) = Q_k(C_{Artery,i} - C_{k,i}/Kp_{k,i})$$

- Liver

$$\begin{aligned} V_{Liver}(dC_{Liver,1}/dt) &= Q_{H.A.}C_{Artery,1} + Q_{Spleen}C_{Spleen,1}/Kp_{Spleen,1} + \\ &Q_{Pancreas}C_{Pancreas,1}/Kp_{Pancreas,1} + Q_{Stomach}C_{Stomach,1}/Kp_{Stomach,1} + Q_{S.I.}C_{S.I.,1}/Kp_{S.I.,1} + \\ &Q_{L.I.}C_{L.I.,1}/Kp_{L.I.,1} + k_{a,1}X_{S.I.,1} - C_{Liver,1}(Q_{H.V.} + CL_{bile,1} + CL_{CES,1} + CL_{3A4,1} + CL_{3A4,2})/ \\ &Kp_{Liver,1} \end{aligned}$$

$$\begin{aligned} V_{Liver}(dC_{Liver,2}/dt) &= Q_{H.A.}C_{Artery,2} + Q_{Spleen}C_{Spleen,2}/Kp_{Spleen,2} + \\ &Q_{Pancreas}C_{Pancreas,2}/Kp_{Pancreas,2} + Q_{Stomach}C_{Stomach,2}/Kp_{Stomach,2} + Q_{S.I.}C_{S.I.,2}/Kp_{S.I.,2} + \\ &Q_{L.I.}C_{L.I.,2}/Kp_{L.I.,2} + k_{a,2}X_{S.I.,2} + C_{Liver,1}CL_{CES,1}/Kp_{Liver,1} + C_{Liver,4}CL_{CES,2}/Kp_{Liver,4} - \\ &C_{Liver,2}(Q_{H.V.} + CL_{bile,2} + CL_{UGT})/Kp_{Liver,2} \end{aligned}$$

$$\begin{aligned} V_{Liver}(dC_{Liver,3}/dt) &= Q_{H.A.}C_{Artery,3} + Q_{Spleen}C_{Spleen,3}/Kp_{Spleen,3} + \\ &Q_{Pancreas}C_{Pancreas,3}/Kp_{Pancreas,3} + Q_{Stomach}C_{Stomach,3}/Kp_{Stomach,3} + Q_{S.I.}C_{S.I.,3}/Kp_{S.I.,3} + \end{aligned}$$

$$Q_{L.I.}C_{L.I.,3}/K_{pL.I.,3} + k_{a,3}X_{S.I.,3} + C_{Liver,2}CL_{UGT}/K_{pLiver,2} - C_{Liver,3}(Q_{H.V.} + CL_{bile,3})/$$

$$K_{pLiver,3}$$

$$V_{Liver}(dC_{Liver,4}/dt) = Q_{H.A.}C_{Artery,4} + Q_{Spleen}C_{Spleen,4}/K_{pSpleen,4} +$$

$$Q_{Pancreas}C_{Pancreas,4}/K_{pPancreas,4} + Q_{Stomach}C_{Stomach,4}/K_{pStomach,4} + Q_{S.I.}C_{S.I.,4}/K_{pS.I.,4} +$$

$$Q_{L.I.}C_{L.I.,4}/K_{pL.I.,4} + k_{a,4}X_{S.I.,4} + C_{Liver,1}CL_{3A4,2}/K_{pLiver,1} - C_{Liver,4}(Q_{H.V.} + CL_{bile,4} +$$

$$CL_{CES,2})/K_{pLiver,4}$$

$$V_{Liver}(dC_{Liver,5}/dt) = Q_{H.A.}C_{Artery,5} + Q_{Spleen}C_{Spleen,5}/K_{pSpleen,5} +$$

$$Q_{Pancreas}C_{Pancreas,5}/K_{pPanc.,5} + Q_{Stomach}C_{Stomach,5}/K_{pStomach,5} + Q_{S.I.}C_{S.I.,5}/K_{pS.I.,5} +$$

$$Q_{L.I.}C_{L.I.,5}/K_{pL.I.,5} + k_{a,5}X_{S.I.,5} + C_{Liver,1}CL_{3A4,1}/K_{pLiver,1} - C_{Liver,5}(Q_{H.V.} + CL_{bile,5})/$$

$$K_{pLiver,5}$$

## (2) Elimination compartments

### - Transit compartments

$$dX_{Transit,1,i}/dt = C_{Liver,i}CL_{bile,i}/K_{pLiver,i} - k_{bile,i}X_{Transit,1,i}$$

$$dX_{Transit,2,i}/dt = k_{bile,i}X_{Transit,1,i} - k_{bile,i}X_{Transit,2,i}$$

$$dX_{Transit,3,i}/dt = k_{bile,i}X_{Transit,2,i} - k_{bile,i}X_{Transit,3,i}$$

### - Small intestine

$$dX_{S.I.,i}/dt = k_{bile,i}X_{Transit,3,i} - (k_{a,i} + k_{L.I.,i}) X_{S.I.,i}$$

- Large intestine

$$dX_{L.I.,i}/dt = k_{L.I.,i}X_{S.I.,i} - k_{feces,i}X_{L.I.,i}$$

- Urine

$$dX_{Urine,i} = CL_{r,i}C_{Kidney,i}/K_{pKidney,i}$$

- Feces

$$dX_{Feces,i} = k_{feces,i}X_{L.I.,i}$$
